# Supplementary material for: Socioenvironmental factors associated with Schistosoma mansoni infection and intermediate hosts in an urban area of northeastern Brazil
Source: PubMed Central journal article supplement (PMC5931446; doi:10.1371/journal.pone.0195519), 2018-05-02
Supplement: pone.0195519.s001.pdf [file pone.0195519.s001.pdf]

**PROFILE OF EPIDEMIOLOGICAL Schistosomiasis in an endemic area in municipality of Nossa Senhora do Socorro**  
**Questionnaire 1 - ENVIRONMENTAL, economic, and cultural population's health of schistosomiasis**

**GENERAL DATA**

Date: \_\_\_/\_\_\_/\_\_\_ Address: \_\_\_\_\_

• **IDENTIFICATION INFO:**

- 1) Name (Initial): \_\_\_\_\_ 2) Gender:  F  F
- 3) Address: \_\_\_\_\_ Complement: \_\_\_\_\_
- 4) Date of Birth: \_\_\_ / \_\_\_ / \_\_\_ (dd / mm / yyyy) Age: \_\_\_\_\_
- 5) Race:  
 White  Black  Brow  Indigenous  East
- 6) Birth: \_\_\_\_\_ State: \_\_\_\_\_
- 7) Status:  
Single  Married  Divorced  Widowed  Stable Union
- 8) Residence time in the headlights Park Set:  
Years: \_\_\_\_\_ Meses \_\_\_\_\_  
Obs .: If <1 year specify place of origin: \_\_\_\_\_

• **SOCIOECONOMIC DATA:**

- 9) This working:  
 Yes  No
- 10) What is your main activity: \_\_\_\_\_
- 11) What is your status in employment  
 Retired  Entrepreneur  From Home  Salaried  Student  
 Self-Employed  Public Employee  Pensioner  Other \_\_\_\_\_
- 12) Household Income:  
 No yield;  Up to 1 MW;  More1 to2 SM;  More2 to 3 MW;  
 More 3 to5 MW;  More than 5 MW.
- If no reply or to yield 1Sa:  
Receive any supplementary official income such as Bolsa Familia  Yes  No
- 13) Education:  
Illiterate ; Key  Complete  Incomplete  
Medium  Complete  Incomplete  
Graduated  Incomplete

• **SOCIAL AND ENVIRONMENTAL DATA:**

- 14) Form water supply at home:  
 Public;  Artesian well;  Direct collection in the river;  Other
- 15) Water treatment at home for consumption:  
 No treatment;  Filtration;  Boiling;  Chlorination;  other \_\_\_\_\_
- 16) Waste Destination of the household:

- Public collection;  Burnt;  Buried;  Played in a vacant lot;  Played in the river;
  - Another destination.
- 17) Disposition of fecal / urine household:
- Sewerage;  Septic;  Played in a vacant lot;  Played in the river;
  - Another destination.
- 18) Type of house:
- Brick / adobe;  Coated Taipa;  Taipa uncoated;
  - Wood;  Board;  Material not used.
- 19) The floor of the house:
- Cement;  Ceramics;  Clay apilado.
- 20) You have access to electricity:
- Yes  No

- **CONTACT INFORMATION WITH RIVER WATER / STREAM / OTHER (specify) .....**:
- 21) Have you ever had contact with river water:
- Yes  No
  - If yes, how long: \_\_\_\_\_
- 22) Since the contact happens:
- Car Wash / animal;  Washing;  Wash dishes / pot;  Recreation;  Personal Hygiene;
  - Fishing.
- 23) Have you had direct contact with the water streams:
- Yes  No.
  - If so, why not: \_\_\_\_\_
- 24) Other (report)
- .....
- .....
- .....

- **DISEASES ASSOCIATED DATA AND LIFE HABITS:**
- 24) You are stricken by some (s) disease (s):
- Yes  No If yes, which one (s): \_\_\_\_\_
- 25) Have you had any signs and / or symptoms:
- Diarrhea  Yes  No; Mucus in the stool  Yes  No; Blood in the stool  Yes  No
- 26) makes use of alcoholic beverages:
- Yes  No
- 27) Do you smoke:
- Yes  No
- 28) habit of eating vegetables or fruits without washing:
- Yes  No.
- 29) smoker walking barefoot through the streets of your neighborhood:
- Yes;  No.
